# Supplementary material for: Cationic, linear Au(i) N-heterocyclic carbene complexes: synthesis, structure and anti-mitochondrial activity
Source: Royal Society of Chemistry journal article supplement (doi:10.1039/b602560a), 2006-01-01
Supplement: b602560a.pdf [file b602560a.pdf]

**Cationic, linear Au(I) *N*-heterocyclic carbene complexes: synthesis, structure and anti-mitochondrial activity**

**Murray V. Baker,\* Peter J. Barnard, Susan J. Berners-Price,\* Simon K. Brayshaw,  
James L. Hickey, Brian W. Skelton and Allan H. White**

*Chemistry M313,<sup>1</sup> The University of Western Australia, 35 Stirling Highway, Crawley, WA, 6009,  
Australia*

**Fig. S1** (a) The centrosymmetric [(Me,Et-Im)<sub>2</sub>Au]<sup>+</sup> cation in **2.PF<sub>6</sub>**; (b) The centrosymmetric [(*i*-Pr<sub>2</sub>Im)<sub>2</sub>Au]<sup>+</sup> cation in **3.Cl**; (c) The [(Cy<sub>2</sub>Im)<sub>2</sub>Au]<sup>+</sup> cation in **6.PF<sub>6</sub>** (2-symmetry).

**Fig. S2** (a) The three cations of [(*n*-Bu<sub>2</sub>Im)<sub>2</sub>Au]<sup>+</sup> in **4.PF<sub>6</sub>**; cations 1 and 2 are centrosymmetric. (b) Unit cell contents of [(*n*-Bu<sub>2</sub>Im)<sub>2</sub>Au][PF<sub>6</sub>] (**4.PF<sub>6</sub>**) projected down *a*.

**Table S1.** Microanalysis results for hexafluorophosphate salts.

---

<sup>1</sup> School of Biomedical, Biomolecular and Chemical Sciences

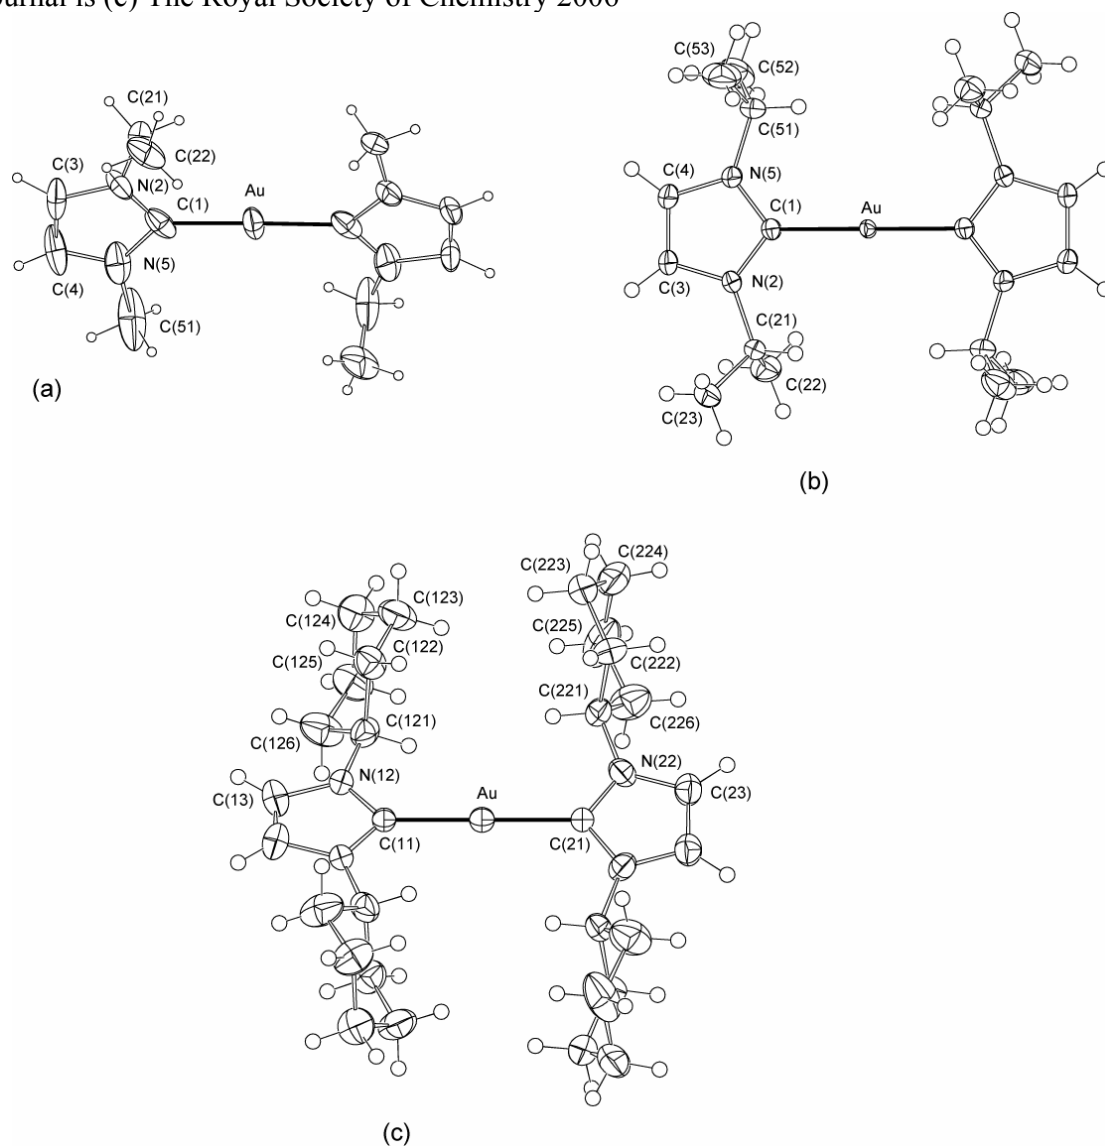

**Fig. S1** (a) The centrosymmetric  $[(\text{Me,Et-Im})_2\text{Au}]^+$  cation in **2.PF<sub>6</sub>**; (b) The centrosymmetric  $[(i\text{-Pr}_2\text{Im})_2\text{Au}]^+$  cation in **3.Cl**; (c) The  $[(\text{Cy}_2\text{Im})_2\text{Au}]^+$  cation in **6.PF<sub>6</sub>** (2-symmetry).

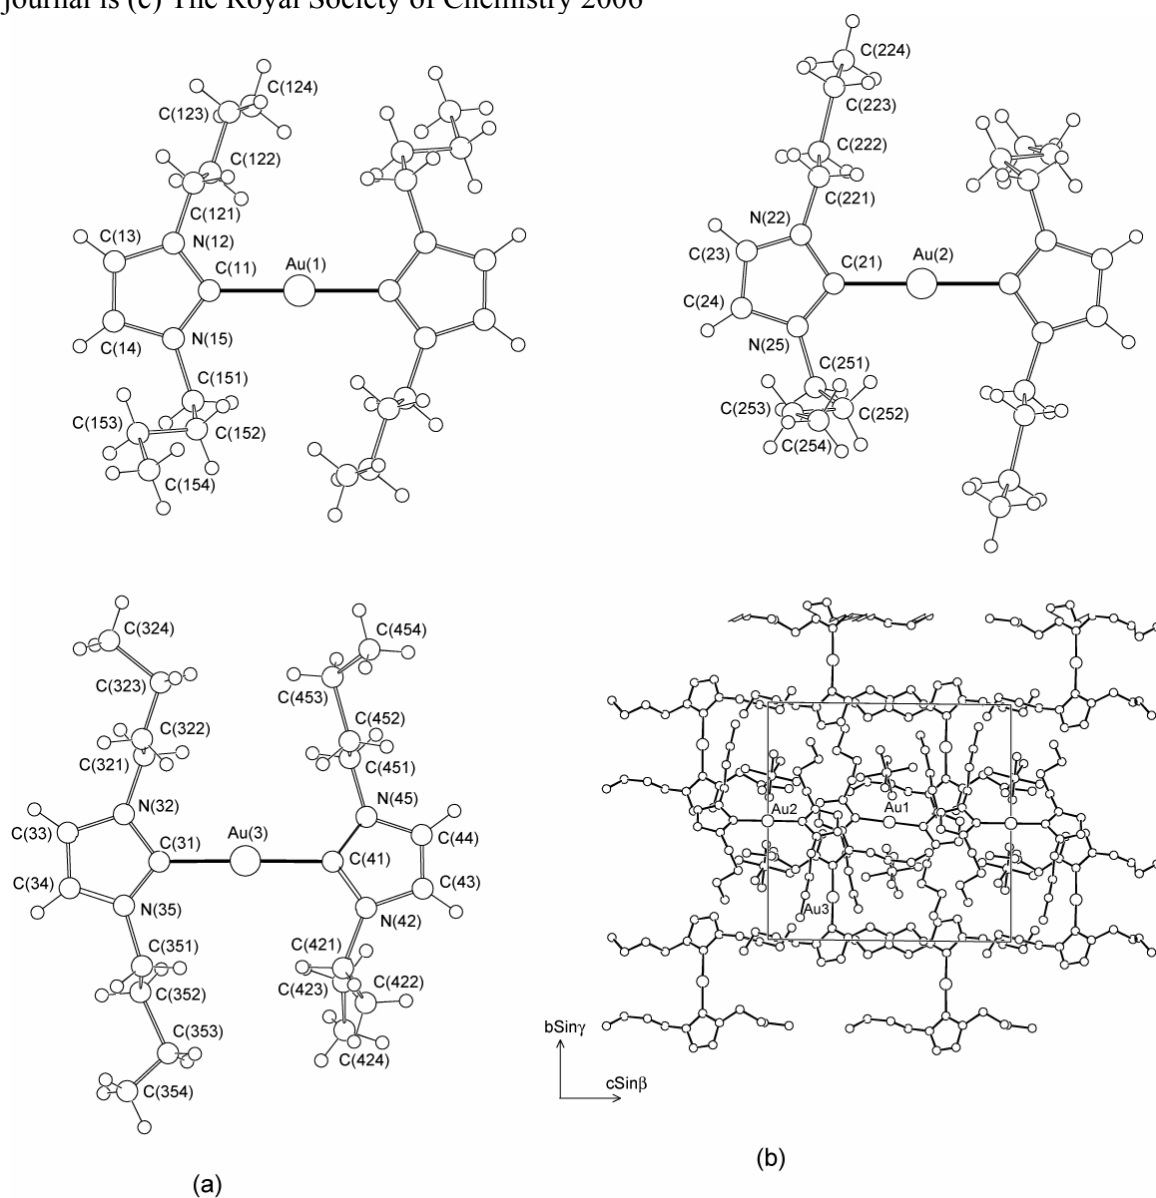

**Fig. S2** (a) The three cations of  $[(n\text{-Bu}_2\text{Im})_2\text{Au}]^+$  in  $4.\text{PF}_6$ ; cations 1 and 2 (top two structures in Figure) are centrosymmetric. (b) Unit cell contents of  $[(n\text{-Bu}_2\text{Im})_2\text{Au}][\text{PF}_6]$  ( $4.\text{PF}_6$ ) projected down  $a$ .

**Table S1.** Microanalysis results for hexafluorophosphate salts.

| <b>Formula</b>          |                                                                        | <b>Found</b> |          |          | <b>Calculated</b> |          |          |
|-------------------------|------------------------------------------------------------------------|--------------|----------|----------|-------------------|----------|----------|
|                         |                                                                        | <b>C</b>     | <b>H</b> | <b>N</b> | <b>C</b>          | <b>H</b> | <b>N</b> |
| <b>1.PF<sub>6</sub></b> | C <sub>10</sub> H <sub>16</sub> N <sub>4</sub> AuPF <sub>6</sub>       | 22.09        | 2.71     | 10.22    | 22.48             | 3.02     | 10.49    |
| <b>3.PF<sub>6</sub></b> | C <sub>18</sub> H <sub>32</sub> N <sub>4</sub> AuPF <sub>6</sub>       | 33.56        | 5.03     | 8.61     | 33.45             | 4.99     | 8.67     |
| <b>4.PF<sub>6</sub></b> | C <sub>22</sub> H <sub>40</sub> N <sub>4</sub> AuPF <sub>6</sub>       | 37.50        | 5.89     | 7.78     | 37.61             | 5.74     | 7.98     |
| <b>5.PF<sub>6</sub></b> | C <sub>22</sub> H <sub>40</sub> N <sub>4</sub> AuPF <sub>6</sub> .EtOH | 38.95        | 6.03     | 7.66     | 38.50             | 6.19     | 7.48     |
| <b>6.PF<sub>6</sub></b> | C <sub>30</sub> H <sub>48</sub> N <sub>4</sub> AuPF <sub>6</sub>       | 45.22        | 6.34     | 6.78     | 45.08             | 6.11     | 6.87     |
